# Supplementary material for: A Method to Locally Irradiate Specific Organ in Model Organisms Using a Focused Heavy-Ion Microbeam
Source: MDPI journal article supplement (doi:10.3390/biology12121524), 2023-12-14
Supplement: s1 [file s1]

## Supplementary Materials:

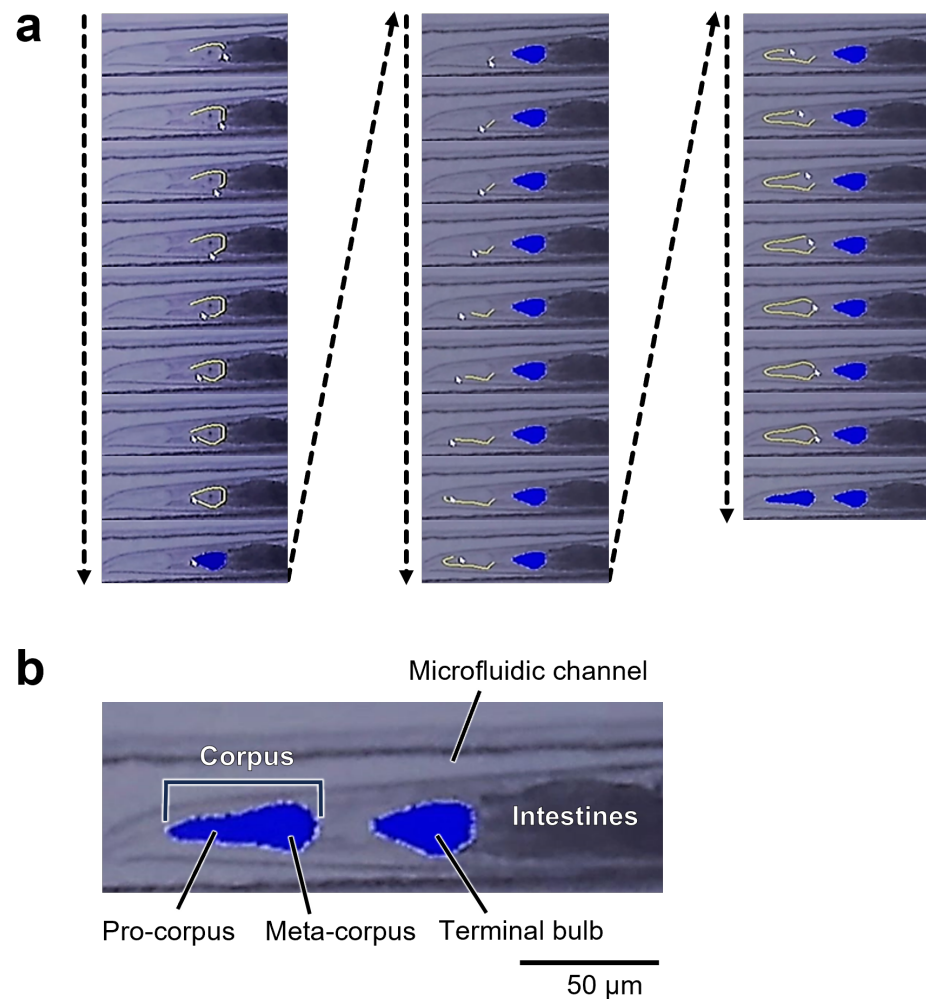

**Figure S1.** Animated captured images of the selecting operation of the targeted area. (a) Example of the situation during the target area selection operation. The view during the selection of the pro-corpus and meta-corpus (anterior bulb) and terminal bulb (posterior bulb) is shown in Figure 6a. Clicking with the mouse draws the boundaries of the target area (indicated by a yellow line) and fills in the interior with blue once the target area has been selected. The drawing of each mouse click was captured from a video of the target area selection operation from behind. The 26 images are arranged sequentially from top to bottom and left to right. (b) The targeted area selected (blue). Only the corpus and terminal bulb (posterior bulb) are selected. This panel corresponds to Figure 6a.
